# Supplementary material for: Association of Hydrophobic Carboxyl-Terminal Dendrimers with Lymph Node-Resident Lymphocytes
Source: MDPI journal article supplement (doi:10.3390/polym12071474), 2020-06-30
Supplement: s1 [file s1]

## Supporting Information

# Association of Hydrophobic Carboxyl-Terminal Dendrimers with Lymph Node-Resident Lymphocytes

Yutaka Nishimoto <sup>1</sup>, Misaki Nishio <sup>1</sup>, Shu Nagashima <sup>1</sup>, Kohei Nakajima <sup>2</sup>, Takayuki Ohira <sup>2</sup>, Shinya Nakai <sup>3</sup>, Ikuhiko Nakase <sup>3</sup>, Kei Higashikawa <sup>4</sup>, Yuji Kuge <sup>4</sup>, Akikazu Matsumoto <sup>1</sup>, Mikako Ogawa <sup>2</sup> and Chie Kojima <sup>1\*</sup>

<sup>1</sup> Department of Applied Chemistry, Graduate School of Engineering, Osaka Prefecture University, 1-1 Gakuen-cho, Naka-ku, Sakai, Osaka 599-8531, Japan

<sup>2</sup> Laboratory of Bioanalysis and Molecular Imaging, Graduate School of Pharmaceutical Sciences, Hokkaido University, Kita-12 Nishi-6, Kita-ku, Sapporo, Hokkaido 060-0812, Japan

<sup>3</sup> Department of Biological Science, Graduate School of Science, Osaka Prefecture University, 1-2, Gakuen-cho, Naka-ku, Sakai, Osaka, 599-8570, Japan

<sup>4</sup> Central Institutes of Isotope Science, Hokkaido University, Kita 15 Nishi 7, Kita-ku, Sapporo, Hokkaido 060-0815, Japan

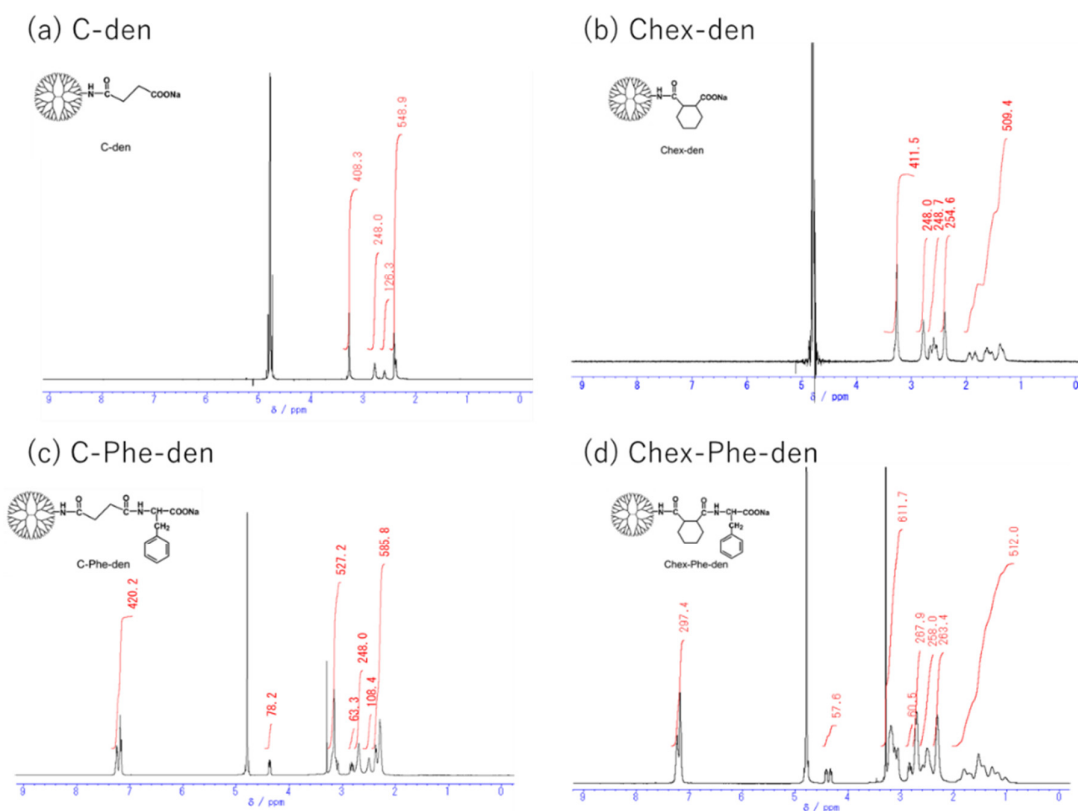

**Figure S1.** <sup>1</sup>H NMR spectra of (a) C-den, (b) Chex-den, (c) C-Phe-den and (d) Chex-Phe-den.
